# Supplementary material for: Remodeling of extracellular matrix collagen IV by MIG-6/papilin regulates neuronal architecture
Source: Research Square preprint supplement (doi:10.21203/rs.3.rs-5962240/v1), 2025-02-14
Supplement: Supplementary file 1 [file a3eca715ec788bdcf5243b43.xlsx]

## Sheet: Fig S1B
Genotype	N	% Defective	S.E.P.
sax-7(qv24); oyIs14	111	91	3
sax-7(qv30); qv18 oyIs14	114	43	5

## Sheet: Fig S2
Genotype	N	% Muscle cells with defects	S.E.P.
stEx30	185	37.3	2.74
mig-6(qv33); stEx30	183	42.1	3.11

## Sheet: Fig S4
Genotype	N	% Defective	S.E.P.
hdIs26	126	3.2	0
sax-7(qv30); mig-6(qv33); hdIs26	204	35.8	4.15
hdIs26 III; qvEx616	148	2.0	1.15
hdIs26 III; qvEx617	140	0	0

## Sheet: Fig S5B
Genotype	N	Body Length (µm)	S.E.M.
hdIs26	10	1278.8	11.32
mig-17(k174); hdIs26	12	1159.0	11.12
sax-7(qv30); hdIs26	14	1038.7	15.45
sax-7(qv30); mig-17(k174); hdIs26	11	1065.2	20.74
mig-6(qv33); hdIs26	10	1169.3	23.67
mig-6(qv33) mig-17(k174); hdIs26	17	1173.5	17.37
		Pharynx Length (µm)	S.E.M.
hdIs26	17	148.3	1.20
mig-17(k174); hdIs26	18	179.2	2.99
sax-7(qv30); hdIs26	15	146.1	1.41
sax-7(qv30); mig-17(k174); hdIs26	16	172.8	2.82
mig-6(qv33); hdIs26	15	151.0	1.34
mig-6(qv33) mig-17(k174); hdIs26	21	168.1	2.39

## Sheet: Fig S5C
Genotype	N	Neuron Spread/Body Length Ratio	S.E.M.
hdIs26	10	0.0056	0.0007
mig-17(k174); hdIs26	12	0.0071	0.0012
sax-7(qv30); hdIs26	14	0.0105	0.0018
sax-7(qv30); mig-17(k174); hdIs26	11	0.0090	0.0015
mig-6(qv33); hdIs26	10	0.0052	0.0012
mig-6(qv33) mig-17(k174); hdIs26	17	0.0045	0.0007

## Sheet: Fig S5D
Genotype	N	Nerve Ring Position/Body Length Ratio	S.E.M.
hdIs26	10	0.08	0
mig-17(k174); hdIs26	12	0.09	0
sax-7(qv30); hdIs26	14	0.11	0
sax-7(qv30); mig-17(k174); hdIs26	11	0.10	0
mig-6(qv33); hdIs26	10	0.09	0
mig-6(qv33) mig-17(k174); hdIs26	17	0.09	0

## Sheet: Fig S7
EMB-9::mCherry
Genotype		N	Fluorescence Intensity (AU)	S.E.M.
qyIs46	L1	8	1.33 x 107	0.09 x 107
	L2	10	3.87 x 107	0.44 x 107
	L3	11	7.50 x 107	0.93 x 107
	L4	11	18.69 x 107	0.98 x 107
	Young Adult	12	34.40 x 107	1.22 x 107
	Day 2	24	77.81 x 107	1.79 x 107
	Day 5	12	71.09 x 107	1.64 x 107
mig-6(qv33); qyIs46	L1	6	1.36 x 107	0.11 x 107
	L2	8	4.12 x 107	0.44 x 107
	L3	11	11.23 x 107	1.04 x 107
	L4	11	23.26 x 107	1.33 x 107
	Young Adult	17	42.74 x 107	1.29 x 107
	Day 2	19	94.96 x 107	2.33 x 107
	Day 5	8	81.05 x 107	2.72 x 107

## Sheet: Fig S8B
Genotype		N	Normalized Fluorescence Intensity	S.E.M.
	Time point (hr)
Pharynx BM
qyIs46	0	4	0	0
	2.5	4	0.11	0.02
	5	4	0.17	0.02
	7.5	4	0.15	0.02
	10	4	0.19	0.01
mig-6(qv33); qyIs46	0	4	0	0
	2.5	4	0.09	0.03
	5	4	0.13	0.04
	7.5	4	0.16	0.05
	10	4	0.18	0.05
Muscle
qyIs46	0	4	0	0
	2.5	4	0.23	0.07
	5	4	0.29	0.03
	7.5	4	0.28	0.02
	10	4	0.38	0.05
mig-6(qv33); qyIs46	0	4	0	0
	2.5	4	0.22	0.04
	5	4	0.24	0.05
	7.5	4	0.25	0.04
	10	4	0.34	0.08

## Sheet: Fig S9A
FigureS12a
	Refractive index											Refractive index
L2											L4
genotype	ROI	Area	Mean	Min	Max	IntDens	Median	RawIntDensity	Relative value		genotype	ROI	Area	Mean	Min	Max	IntDens	Median	RawIntDensity	Relative value
WT	1	3390	1.355	1.32	1.412	4592.47	1.354	4592.47	1.01		WT	1	8876	1.341	1.302	1.412	11901.2	1.339	11901.2	1.00106
	2	3342	1.351	1.309	1.417	4514.38	1.343	4514.38	1.00245			2	3600	1.329	1.286	1.379	4784.15	1.329	4784.15	0.9921
	3	3087	1.347	1.326	1.366	4159.56	1.347	4159.56	0.99948			3	6654	1.339	1.293	1.437	8911.3	1.337	8911.3	0.999565
	4	2835	1.344	1.317	1.366	3811.17	1.345	3811.17	0.99725			4	3157	1.33	1.29	1.369	4199.74	1.33	4199.74	0.992846
	5	3027	1.351	1.324	1.385	4088.02	1.348	4088.02	1.00245			5	2656	1.325	1.293	1.368	3519.88	1.326	3519.88	0.989114
	6	2490	1.35	1.304	1.386	3360.68	1.349	3360.68	1.00171			6	6335	1.336	1.303	1.411	8465.05	1.334	8465.05	0.997325
	7	3253	1.344	1.316	1.373	4371.01	1.344	4371.01	0.99725			7	5986	1.335	1.296	1.418	7988.51	1.335	7988.51	0.996579
	8	2633	1.344	1.316	1.364	3538.11	1.344	3538.11	0.99725			8	6399	1.345	1.288	1.375	8605.23	1.347	8605.23	1.00404
	9	5241	1.345	1.324	1.377	7051.52	1.345	7051.52	0.998			9	7634	1.349	1.323	1.371	10299.3	1.349	10299.3	1.00703
	10	3461	1.346	1.323	1.388	4658.11	1.343	4658.11	0.99874			10	6794	1.349	1.312	1.401	9163.31	1.349	9163.31	1.00703
	11	2007	1.352	1.336	1.364	2713.03	1.352	2713.03	1.00235			11	8558	1.35	1.308	1.404	11549.1	1.349	11549.1	1.00778
	12	1284	1.351	1.334	1.381	1735.02	1.352	1735.02	1.00161			12	4919	1.347	1.313	1.392	6625.28	1.348	6625.28	1.00554
	13	3166	1.351	1.323	1.373	4276.64	1.352	4276.64	1.00161			13	6355	1.346	1.306	1.379	8554.95	1.347	8554.95	1.00022
	14	2787	1.346	1.313	1.374	3752.33	1.347	3752.33	0.9979			14	8947	1.344	1.302	1.404	12021.5	1.343	12021.5	0.998737
	15	3402	1.349	1.324	1.387	4588.8	1.349	4588.8	1.00013			15	7065	1.35	1.303	1.387	9534.55	1.351	9534.55	1.0032
	16	2232	1.346	1.326	1.376	3004.12	1.346	3004.12	0.9979			16	9355	1.357	1.31	1.402	12694.6	1.358	12694.6	1.0084
	17	2812	1.352	1.327	1.395	3800.58	1.35	3800.58	1.00235			17	8438	1.346	1.316	1.381	11358	1.345	11358	1.00022
	18	2559	1.349	1.316	1.397	3451.93	1.348	3451.93	1.00013			18	11507	1.347	1.313	1.4	15503.6	1.345	15503.6	1.00097
	19	3256	1.343	1.315	1.369	4373.63	1.343	4373.63	0.99568			19	5840	1.347	1.315	1.382	7866.82	1.347	7866.82	1.00097
	20	4767	1.348	1.313	1.381	6424.71	1.348	6424.71	0.99939			20	8187	1.355	1.321	1.41	11090.3	1.356	11090.3	1.00691
	21	3488	1.345	1.319	1.368	4690.74	1.345	4690.74	0.99716			21	7570	1.343	1.292	1.381	10166.1	1.344	10166.1	0.997994
	22	2833	1.346	1.318	1.371	3813.79	1.346	3813.79	0.9979			22	8763	1.356	1.309	1.41	11884.5	1.357	11884.5	1.00765
	23	3478	1.353	1.317	1.374	4705.71	1.353	4705.71	1.00309			23	10306	1.339	1.308	1.368	13801.3	1.339	13801.3	0.995021
	24	2889	1.351	1.321	1.378	3902.32	1.352	3902.32	1.00161			24	7310	1.338	1.315	1.369	9781.12	1.338	9781.12	0.994278
	25	2157	1.351	1.334	1.365	2914.78	1.352	2914.78	1.00161			25	7341	1.34	1.3	1.375	9839.18	1.341	9839.18	0.995764
	26	1107	1.354	1.337	1.365	1498.45	1.354	1498.45	1.00384			26	9697	1.343	1.3	1.399	13018.6	1.342	13018.6	0.997994
	27	2971	1.354	1.315	1.38	4024.17	1.355	4024.17	1.00384			27	9931	1.338	1.312	1.368	13289.1	1.338	13289.1	0.994278
	28	3267	1.343	1.317	1.384	4387.69	1.343	4387.69	0.99568			28	6897	1.341	1.304	1.383	9251.64	1.34	9251.64	0.996507
	29	2985	1.352	1.321	1.383	4035.85	1.353	4035.85	1.00235			29	5050	1.344	1.313	1.383	6788.36	1.344	6788.36	0.998737
	30	2971	1.353	1.317	1.381	4021.11	1.354	4021.11	1.00309			30	7085	1.351	1.306	1.386	9568.78	1.35	9568.78	1.00394
	31	3267	1.343	1.315	1.383	4388	1.343	4388	0.99568			31	7269	1.35	1.307	1.393	9814.24	1.351	9814.24	1.0032
	32	3542	1.346	1.32	1.391	4767.46	1.343	4767.46	0.9979			32	12330	1.339	1.274	1.395	16505.8	1.339	16505.8	0.995021
	33	5428	1.345	1.321	1.373	7298.32	1.344	7298.32	0.99716
	34	3901	1.343	1.327	1.366	5239.94	1.344	5239.94	0.99703				average	1.34341					average	1
	35	2312	1.343	1.33	1.367	3105.14	1.343	3105.14	0.99703				stdev	0.00750813					stdev	0.00513246
	36	1911	1.352	1.325	1.37	2583.16	1.352	2583.16	1.00371
	37	2704	1.35	1.315	1.373	3649.85	1.35	3649.85	1.00223
	38	2395	1.356	1.324	1.382	3247.83	1.358	3247.83	1.00682		genotype	ROI	Area	Mean	Min	Max	IntDens	Median	RawIntDensity	Relative value
	39	2877	1.354	1.334	1.379	3895.06	1.354	3895.06	1.00534		mig-6(qv33)	1	9009	1.358	1.31	1.435	12230.9	1.36	12230.9	1.01375
	40	1811	1.346	1.331	1.365	2437.75	1.346	2437.75	0.9994			2	8051	1.357	1.304	1.4	10921.3	1.359	10921.3	1.013
	41	3586	1.344	1.328	1.357	4819.68	1.345	4819.68	0.99791			3	7264	1.346	1.291	1.383	9777.59	1.345	9777.59	1.00479
	42	1646	1.337	1.321	1.356	2200.36	1.336	2200.36	0.99271			4	8637	1.343	1.295	1.379	11601.8	1.342	11601.8	1.00255
	43	3263	1.349	1.327	1.371	4401.75	1.349	4401.75	1.00162			5	5783	1.345	1.307	1.375	7776.81	1.345	7776.81	0.99948
	44	1601	1.336	1.315	1.359	2138.79	1.335	2138.79	0.99197			6	6346	1.346	1.302	1.377	8544.42	1.348	8544.42	1.00022
	45	3146	1.348	1.317	1.378	4241.72	1.349	4241.72	1.00088			7	6551	1.36	1.304	1.41	8909.48	1.362	8909.48	1.01063
	46	2157	1.351	1.328	1.383	2914.53	1.351	2914.53	1.00311			8	5767	1.352	1.309	1.387	7795.95	1.353	7795.95	1.00468
	47	4402	1.351	1.324	1.378	5946.79	1.352	5946.79	1.00311			9	8392	1.342	1.31	1.38	11261.5	1.342	11261.5	0.997251
	48	1933	1.357	1.334	1.375	2622.21	1.357	2622.21	1.00756			10	7954	1.342	1.312	1.382	10676	1.342	10676	0.997251
	49	3333	1.353	1.333	1.377	4510.33	1.353	4510.33	1.00459			11	6070	1.339	1.31	1.379	8128.46	1.339	8128.46	0.995021
	50	1034	1.334	1.31	1.359	1379.15	1.333	1379.15	0.99049			12	7660	1.335	1.285	1.382	10224.2	1.335	10224.2	0.992049
	51	3103	1.339	1.32	1.358	4155.1	1.339	4155.1	0.9942			13	4732	1.341	1.315	1.375	6347.86	1.34	6347.86	0.996507
	52	2082	1.346	1.324	1.369	2802.25	1.346	2802.25	0.9994			14	6715	1.344	1.309	1.382	9022.75	1.344	9022.75	0.998737
	53	4383	1.348	1.323	1.375	5907.43	1.349	5907.43	1.00088			15	8216	1.35	1.31	1.42	11087.9	1.348	11087.9	1.0032
												16	7191	1.347	1.307	1.399	9687.45	1.348	9687.45	1.00097
		average	1.34787					average	1.00009			17	6021	1.34	1.304	1.396	8070.9	1.34	8070.9	0.995764
		stdev	0.00499538					stdev	0.00382651			18	6729	1.345	1.298	1.409	9047.48	1.343	9047.48	0.99948
												19	5180	1.341	1.308	1.39	6946.21	1.341	6946.21	0.996507
												20	9672	1.343	1.312	1.385	12990.7	1.343	12990.7	0.997994
genotype	ROI	Area	Mean	Min	Max	IntDens	Median	RawIntDensity	Relative value			21	6119	1.34	1.296	1.399	8196.41	1.339	8196.41	0.995764
mig-6(qv33)	1	2167	1.345	1.325	1.377	2913.89	1.343	2913.89	0.998			22	5749	1.344	1.3	1.388	7726.88	1.343	7726.88	0.998737
	2	1913	1.342	1.321	1.384	2567.55	1.339	2567.55	0.99577			23	5900	1.341	1.305	1.378	7912.2	1.341	7912.2	0.996507
	3	1459	1.353	1.327	1.403	1974.53	1.353	1974.53	1.00393			24	8307	1.338	1.301	1.38	11114.6	1.338	11114.6	0.994278
	4	1679	1.347	1.315	1.401	2261.16	1.345	2261.16	0.99948			25	4811	1.351	1.321	1.397	6501.74	1.351	6501.74	1.00394
	5	1611	1.341	1.329	1.358	2159.84	1.341	2159.84	0.99503			26	7838	1.347	1.316	1.385	10554.4	1.347	10554.4	1.00097
	6	1797	1.34	1.317	1.365	2407.1	1.339	2407.1	0.99429
	7	1621	1.34	1.322	1.356	2171.35	1.339	2171.35	0.99429				average	1.34527					average	1.00039
	8	2094	1.341	1.325	1.366	2807.98	1.34	2807.98	0.99503				stdev	0.00615842					stdev	0.00546729
	9	2213	1.345	1.324	1.371	2976.94	1.345	2976.94	0.99716
	10	2163	1.341	1.325	1.383	2901.47	1.339	2901.47	0.9942				Welch two sample unpaired t-test	p value (WT vs mig-6) mut = 0,3079				Wilcoxon rank sum test with continuity correction	p value (WT vs mig-6) mut = 0,919
	11	4407	1.354	1.322	1.399	5967.24	1.354	5967.24	1.00384					degrees of freedom= 55,987
	12	2384	1.35	1.328	1.385	3217.72	1.346	3217.72	1.00087
	13	2300	1.349	1.327	1.385	3102.99	1.346	3102.99	1.00013
	14	4327	1.353	1.316	1.389	5852.91	1.353	5852.91	1.00309
	15	3181	1.344	1.318	1.377	4276.54	1.344	4276.54	0.99642
	16	1942	1.347	1.325	1.375	2615.76	1.347	2615.76	0.99865
	17	2236	1.352	1.327	1.421	3022.35	1.347	3022.35	1.00235
	18	2676	1.347	1.324	1.407	3603.38	1.344	3603.38	0.99865
	19	1831	1.341	1.329	1.358	2454.66	1.341	2454.66	0.9942
	20	1884	1.34	1.322	1.365	2524.2	1.339	2524.2	0.99346
	21	4046	1.346	1.32	1.386	5445.57	1.345	5445.57	0.9979
	22	3330	1.343	1.318	1.375	4473.34	1.343	4473.34	0.99568
	23	2309	1.348	1.335	1.363	3113.4	1.349	3113.4	1.00074
	24	2663	1.352	1.337	1.366	3599.97	1.352	3599.97	1.00371
	25	2549	1.356	1.327	1.376	3456.1	1.357	3456.1	1.00668
	26	1780	1.355	1.329	1.371	2411.11	1.355	2411.11	1.00594
	27	2227	1.362	1.331	1.385	3032.16	1.363	3032.16	1.01114
	28	2726	1.355	1.33	1.369	3694.73	1.356	3694.73	1.00594
	29	2376	1.35	1.327	1.364	3206.79	1.35	3206.79	1.00223
	30	2559	1.351	1.331	1.366	3456.57	1.351	3456.57	1.00297
	31	2277	1.353	1.32	1.377	3079.83	1.353	3079.83	1.00445
	32	2474	1.356	1.323	1.385	3353.65	1.358	3353.65	1.00668
	33	1832	1.356	1.323	1.376	2484.71	1.357	2484.71	1.00668
	34	2040	1.363	1.33	1.387	2779.83	1.363	2779.83	1.01188
	35	2582	1.355	1.317	1.381	3499.22	1.356	3499.22	1.00594
	36	1667	1.335	1.305	1.363	2224.67	1.335	2224.67	0.991091
	37	1887	1.357	1.319	1.378	2560.65	1.358	2560.65	1.00742
	38	2421	1.352	1.333	1.375	3274	1.352	3274	1.00371
	39	2203	1.351	1.327	1.371	2976.19	1.351	2976.19	1.00297
	40	2475	1.349	1.328	1.367	3338.62	1.349	3338.62	1.00148
	41	1989	1.346	1.323	1.374	2676.92	1.346	2676.92	0.999258
	42	2138	1.349	1.327	1.391	2883.3	1.347	2883.3	1.00162
	43	2108	1.347	1.33	1.384	2839.61	1.345	2839.61	1.00014
	44	2298	1.345	1.323	1.372	3090.88	1.345	3090.88	0.998654
	45	2582	1.341	1.324	1.38	3463.75	1.339	3463.75	0.995684
	46	4209	1.342	1.318	1.38	5648.84	1.34	5648.84	0.996427
	47	2165	1.348	1.317	1.387	2918.6	1.346	2918.6	1.00088
	48	2217	1.354	1.333	1.373	3001.82	1.355	3001.82	1.00534
	49	912	1.35	1.331	1.365	1231.52	1.351	1231.52	1.00237
	50	2283	1.345	1.324	1.364	3071.32	1.345	3071.32	0.998654
	51	2556	1.351	1.324	1.364	3452	1.351	3452	1.00311
		average	1.34853					average	1.00071
		stdev	0.00602093					stdev	0.00468739
		Welch two sample unpaired t-test	p value (WT vs mig-6) mut = 0,5462					Welch two sample unpaired t-test	p value (WT vs mig-6) mut = 0,4615
			degrees of freedom= 97,171						degrees of freedom= 96,514

## Sheet: Fig S9B
	Brillouin shift											Brillouin shift
L2											L4
genotype	ROI	Area	Mean	Min	Max	IntDens	Median	RawIntDensity	Relative value		genotype	ROI	Area	Mean	Min	Max	IntDens	Median	RawIntDensity	Relative value
WT	1	55	6.366	6.224	6.435	350.13	6.376	1400.52	1.00925		WT	1	190.75	6.303	6.097	6.401	1202.36	6.309	4809.43	0.999237
	2	80	6.364	6.147	6.488	509.122	6.373	2036.49	1.01757			2	249.75	6.322	6.175	6.408	1579.03	6.328	6316.1	1.00225
	3	86.25	6.2	6.057	6.287	534.786	6.208	2139.14	0.986041			3	185.5	6.307	6.14	6.446	1169.86	6.302	4679.44	0.999871
	4	56	6.243	6.045	6.372	349.585	6.253	1398.34	0.999373			4	227	6.296	6.142	6.481	1429.08	6.294	5716.32	0.998127
	5	102	6.267	6.061	6.384	639.22	6.266	2556.88	1.00125			5	213	6.382	6.235	6.509	1359.38	6.382	5437.53	1.01176
	6	66.5	6.163	5.99	6.269	409.842	6.174	1639.37	0.983218			6	216	6.351	6.154	6.462	1371.91	6.352	5487.65	1.00685
	7	98.25	6.204	5.948	6.32	609.528	6.208	2438.11	0.991217			7	355.5	6.377	6.169	6.486	2266.92	6.38	9067.7	1.01097
	8	48.75	6.176	6.004	6.279	301.067	6.175	1204.27	0.984787			8	261.5	6.346	6.112	6.488	1659.44	6.35	6637.76	1.00605
	9	63.75	6.213	6.082	6.313	396.054	6.216	1584.22	0.990119			9	168.75	6.241	6.079	6.377	1053.13	6.248	4212.54	0.989408
	10	69	6.162	6.034	6.246	425.167	6.163	1700.67	0.979611			10	238.5	6.296	6.14	6.544	1501.57	6.276	6006.29	0.998127
												11	141.5	6.235	6.104	6.332	882.304	6.241	3529.21	0.988457
		average	6.2358					average	0.994244			12	225.25	6.328	6.107	6.64	1425.34	6.317	5701.35	1.0032
		stdev	0.0736618					stdev	0.0119791			13	284.5	6.278	6.14	6.431	1786.03	6.275	7144.12	0.995274
												14	136.25	6.296	6.094	6.407	857.838	6.318	3431.35	0.998127
												15	200	6.397	6.099	6.542	1279.45	6.398	5117.8	1.01414
genotype	ROI	Area	Mean	Min	Max	IntDens	Median	RawIntDensity	Relative value			16	142.25	6.17	6.041	6.8	877.736	6.172	3510.94	0.978152
mig-6(qv33)	1	65.25	6.337	6.204	6.433	413.515	6.342	1654.06	1.01435
	2	57.25	6.343	6.238	6.416	363.118	6.346	1452.47	1.01167				average	6.30781					average	1
	3	61.75	6.215	6.111	6.304	383.8	6.217	1535.2	0.994008				stdev	0.0580692					stdev	0.00920591
	4	117.75	6.191	6.004	6.3	728.951	6.191	2915.8	0.993377
	5	95.75	6.186	6.096	6.287	592.332	6.184	2369.33	0.991328
	6	83.25	6.178	6.089	6.243	514.282	6.179	2057.13	0.98439		genotype	ROI	Area	Mean	Min	Max	IntDens	Median	RawIntDensity	Relative value
	7	65	6.169	6.066	6.263	400.987	6.175	1603.95	0.987543		mig-6(qv33)	1	133.25	6.262	6.083	6.511	834.358	6.273	3337.43	0.992737
	8	88.5	6.186	6.118	6.254	547.476	6.184	2189.91	0.986124			2	139.75	6.286	6.126	6.487	878.428	6.287	3513.71	0.996542
	9	97.75	6.26	6.083	6.402	611.927	6.263	2447.71	1.00946			3	219.25	6.279	6.073	6.454	1376.76	6.281	5507.05	0.995432
	10	47.75	6.259	6.086	6.392	298.872	6.267	1195.49	1.00788			4	219	6.225	6.075	6.364	1363.23	6.235	5452.9	0.986871
	11	69.75	6.319	6.205	6.451	440.745	6.32	1762.98	1.01719			5	198.75	6.23	6.105	6.367	1238.19	6.227	4952.76	0.987664
	12	96.5	6.356	6.191	6.495	613.336	6.357	2453.34	1.02412			6	257.75	6.249	5.964	6.362	1610.66	6.251	6442.63	0.990676
	13	61.5	6.327	6.231	6.442	389.091	6.324	1556.36	1.01577			7	226.25	6.201	6.027	6.331	1402.97	6.198	5611.9	0.983067
	14	49.75	6.337	6.184	6.449	315.283	6.34	1261.13	1.01687			8	235.25	6.209	6.061	6.337	1460.61	6.212	5842.45	0.984335
												9	198.75	6.298	6.137	6.433	1251.73	6.3	5006.93	0.998444
		average	6.26164					average	1.00386			10	208.25	6.232	6.091	6.363	1297.8	6.233	5191.18	0.987981
		stdev	0.0713049					stdev	0.0134489			11	215.25	6.26	6.121	6.38	1347.47	6.268	5389.89	0.99242
												12	335.25	6.285	6.151	6.411	2107.09	6.29	8428.35	0.996383
		Wilcoxon rank sum test with continuity correction	p value (WT vs mig-6) mut = 0,5005					Wilcoxon rank sum test with continuity correction	p value (WT vs mig-6) mut = 0,5005			13	235.75	6.191	6.069	6.364	1459.55	6.187	5838.19	0.981481
												14	258.25	6.205	6.072	6.317	1602.32	6.207	6409.27	0.983701
												15	223.25	6.231	6.112	6.337	1391.03	6.231	5564.13	0.987823
												16	367	6.16	5.984	6.273	2260.62	6.171	9042.48	0.976567
												17	242.25	6.168	5.997	6.335	1494.13	6.177	5976.51	0.977835
	Brillouin linewidth											18	384.5	6.286	6.063	6.454	2417.07	6.299	9668.26	0.996542
L2												19	416.5	6.265	6.088	6.438	2609.41	6.264	10437.6	0.993213
genotype	ROI	Area	Mean	Min	Max	IntDens	Median	RawIntDensity	Relative value			20	232	6.272	6.043	6.5	1455.16	6.292	5820.64	0.994323
WT	1	55	0.721	0.465	1.267	39.669	0.69	158.675	1.24375			21	353	6.25	6.034	6.552	2206.21	6.247	8824.85	0.990835
	2	80	0.694	0.484	1.289	55.544	0.653	222.177	1.19717			22	325.5	6.295	6.104	6.457	2049.11	6.298	8196.44	0.997969
	3	86.25	0.509	0.35	0.811	43.909	0.503	175.636	0.87804			23	416.75	6.255	6.073	6.456	2606.68	6.261	10426.7	0.991627
	4	56	0.61	0.398	0.962	34.181	0.601	136.725	1.05227			24	310	6.235	6.067	6.454	1932.7	6.225	7730.82	0.988457
	5	102	0.566	0.378	0.923	57.71	0.556	230.839	0.976367			25	309.25	6.272	6.04	6.527	1939.76	6.272	7759.03	0.994323
	6	66.5	0.549	0.377	0.961	36.486	0.534	145.942	0.947042
	7	98.25	0.529	0.377	1.117	51.967	0.516	207.87	0.912541				average	6.24404					average	0.98989
	8	48.75	0.535	0.367	0.855	26.062	0.518	104.247	0.922891				stdev	0.0382841					stdev	0.00606931
	9	63.75	0.534	0.361	0.771	34.057	0.524	136.229	0.921166
	10	69	0.55	0.348	0.991	37.939	0.527	151.757	0.948767				Welch two sample unpaired t-test	p value (WT vs mig-6) mut = 0,0008486					Welch two sample unpaired t-test	p value (WT vs mig-6) mut = 0,0008486
														degrees of freedom= 23,278						degrees of freedom= 23,278
		average	0.5797					average	1
		stdev	0.070797					stdev	0.122127
												Brillouin linewidth
genotype	ROI	Area	Mean	Min	Max	IntDens	Median	RawIntDensity	Relative value
mig-6(qv33)	1	65.25	0.597	0.468	0.877	38.964	0.59	155.857	1.02984		genotype	ROI	Area	Mean	Min	Max	IntDens	Median	RawIntDensity	Relative value
	2	57.25	0.574	0.462	0.818	32.883	0.567	131.53	0.990167		WT	1	190.75	0.585	0.278	1.284	111.547	0.557	446.186	1.09885
	3	61.75	0.509	0.381	1.278	31.458	0.491	125.83	0.87804			2	249.75	0.53	0.346	0.937	132.357	0.517	529.428	0.995539
	4	117.75	0.515	0.36	1.214	60.593	0.497	242.371	0.888391			3	185.5	0.501	0.298	0.983	92.941	0.492	371.764	0.941066
	5	95.75	0.531	0.393	0.946	50.802	0.508	203.209	0.915991			4	227	0.517	0.329	1.13	117.465	0.501	469.859	0.97112
	6	83.25	0.525	0.38	0.879	43.677	0.512	174.708	0.905641			5	213	0.585	0.358	1.149	124.628	0.575	498.511	1.09885
	7	65	0.484	0.355	0.924	31.442	0.466	125.768	0.834915			6	216	0.606	0.385	1.014	130.842	0.59	523.368	1.1383
	8	88.5	0.477	0.345	1.279	42.204	0.464	168.817	0.822839			7	355.5	0.472	0.274	0.775	167.656	0.469	670.623	0.886593
	9	97.75	0.477	0.171	0.865	46.618	0.471	186.472	0.822839			8	261.5	0.463	0.24	0.714	121.033	0.46	484.131	0.869688
	10	47.75	0.465	0.261	0.746	22.201	0.455	88.805	0.802139			9	168.75	0.515	0.345	0.806	86.829	0.507	347.314	0.967363
	11	69.75	0.462	0.271	0.747	32.229	0.457	128.916	0.796964			10	238.5	0.546	0.346	1.09	130.236	0.534	520.946	1.02559
	12	96.5	0.492	0.304	0.785	47.432	0.481	189.727	0.848715			11	141.5	0.49	0.352	0.828	69.264	0.48	277.057	0.920404
	13	61.5	0.515	0.303	0.839	31.65	0.502	126.599	0.888391			12	225.25	0.585	0.353	1.284	131.697	0.566	526.786	1.09885
	14	49.75	0.537	0.276	0.849	26.728	0.531	106.91	0.926341			13	284.5	0.514	0.367	0.809	146.197	0.505	584.787	0.965485
												14	136.25	0.544	0.328	0.818	74.142	0.536	296.567	1.02184
		average	0.511429					average	0.88223			15	200	0.608	0.42	0.877	121.532	0.601	486.129	1.14205
		stdev	0.0390531					stdev	0.0673677			16	142.25	0.457	0.308	0.933	64.97	0.447	259.879	0.858417
		Wilcoxon rank sum test with continuity correction	p value (WT vs mig-6) mut = 0,007034					Wilcoxon rank sum test with continuity correction	p value (WT vs mig-6) mut = 0,007034				average	0.532375					average	1
													stdev	0.0492327					stdev	0.0924774
											genotype	ROI	Area	Mean	Min	Max	IntDens	Median	RawIntDensity	Relative value
	Brillouin loss tangent										mig-6(qv33)	1	133.25	0.524	0.323	0.924	69.881	0.511	279.523	0.984269
L2												2	139.75	0.543	0.321	1.109	75.953	0.524	303.813	1.01996
genotype	ROI	Area	Mean	Min	Max	IntDens	Median	RawIntDensity	Relative value			3	219.25	0.547	0.331	1.183	119.827	0.528	479.307	1.02747
WT	1	55	0.113	0.073	0.197	6.232	0.108	24.93	1.21767			4	219	0.496	0.291	1.275	108.591	0.478	434.364	0.931674
	2	80	0.109	0.076	0.206	8.73	0.103	34.92	1.17457			5	198.75	0.49	0.31	1.283	97.462	0.478	389.85	0.920404
	3	86.25	0.082	0.056	0.133	7.082	0.081	28.328	0.883621			6	257.75	0.508	0.325	1.282	130.878	0.488	523.513	0.954215
	4	56	0.098	0.063	0.158	5.481	0.096	21.923	1.05603			7	226.25	0.528	0.341	1.281	119.453	0.504	477.811	0.991782
	5	102	0.09	0.06	0.15	9.216	0.089	36.864	0.969828			8	235.25	0.499	0.296	1.28	117.365	0.481	469.459	0.937309
	6	66.5	0.089	0.061	0.157	5.925	0.087	23.699	0.959052			9	198.75	0.539	0.316	1.285	107.133	0.514	428.533	1.01244
	7	98.25	0.085	0.061	0.187	8.382	0.083	33.526	0.915948			10	208.25	0.533	0.303	1	111.04	0.518	444.158	1.00117
	8	48.75	0.087	0.059	0.14	4.223	0.084	16.891	0.9375			11	215.25	0.522	0.278	1.037	112.462	0.513	449.847	0.980512
	9	63.75	0.086	0.058	0.125	5.485	0.084	21.938	0.926724			12	335.25	0.473	0.294	1.025	158.647	0.462	634.588	0.888471
	10	69	0.089	0.056	0.163	6.16	0.085	24.639	0.959052			13	235.75	0.441	0.241	1.003	103.959	0.432	415.836	0.828363
												14	258.25	0.455	0.247	0.866	117.527	0.445	470.108	0.854661
		average	0.0928					average	1			15	223.25	0.495	0.345	0.87	110.481	0.485	441.923	0.929796
		stdev	0.0102166					stdev	0.110093			16	367	0.451	0.257	1.197	165.683	0.444	662.733	0.847147
												17	242.25	0.473	0.293	0.996	114.594	0.463	458.377	0.888471
												18	384.5	0.472	0.272	0.693	181.393	0.472	725.573	0.886593
genotype	ROI	Area	Mean	Min	Max	IntDens	Median	RawIntDensity	Relative value			19	416.5	0.448	0.234	0.682	186.547	0.447	746.189	0.841512
mig-6(qv33)	1	65.25	0.094	0.074	0.139	6.149	0.093	24.596	1.01293			20	232	0.518	0.295	0.879	120.173	0.517	480.692	0.972998
	2	57.25	0.091	0.073	0.129	5.185	0.089	20.739	0.980603			21	353	0.479	0.258	0.882	169.088	0.467	676.352	0.899742
	3	61.75	0.082	0.061	0.205	5.06	0.079	20.242	0.883621			22	325.5	0.473	0.27	0.674	153.902	0.471	615.608	0.888471
	4	117.75	0.083	0.058	0.202	9.791	0.08	39.164	0.894397			23	416.75	0.452	0.287	0.726	188.191	0.451	752.763	0.849026
	5	95.75	0.086	0.064	0.153	8.213	0.082	32.854	0.926724			24	310	0.473	0.278	0.861	146.635	0.462	586.541	0.888471
	6	83.25	0.085	0.062	0.142	7.07	0.083	28.282	0.915948			25	309.25	0.51	0.283	1.008	157.741	0.503	630.963	0.957971
	7	65	0.078	0.058	0.15	5.095	0.075	20.378	0.840517
	8	88.5	0.077	0.056	0.206	6.822	0.075	27.288	0.829741				average	0.49368					average	0.927316
	9	97.75	0.076	0.027	0.14	7.449	0.075	29.798	0.818966				stdev	0.032071					stdev	0.0602414
	10	47.75	0.074	0.041	0.121	3.549	0.073	14.195	0.797414
	11	69.75	0.073	0.043	0.116	5.1	0.072	20.4	0.786638				Welch two sample unpaired t-test	p value (WT vs mig-6) mut = 0,01148					Welch two sample unpaired t-test	p value (WT vs mig-6) mut = 0,01148
	12	96.5	0.077	0.047	0.123	7.462	0.076	29.848	0.829741					degrees of freedom= 23,09						degrees of freedom= 23,09
	13	61.5	0.081	0.048	0.133	5.003	0.08	20.01	0.872845
	14	49.75	0.085	0.043	0.134	4.218	0.083	16.873	0.915948
		average	0.0815714					average	0.879002			Brillouin loss tangent
		stdev	0.00611875					stdev	0.0659349
											genotype	ROI	Area	Mean	Min	Max	IntDens	Median	RawIntDensity	Relative value
		Welch two sample unpaired t-test	p value (WT vs mig-6) mut = 0,006104					Welch two sample unpaired t-test	p value (WT vs mig-6) mut = 0,006104		WT	1	190.75	0.093	0.045	0.21	17.708	0.088	70.833	1.10304
			degrees of freedom= 15,11						degrees of freedom= 15,11			2	249.75	0.084	0.055	0.148	20.939	0.082	83.757	0.996294
												3	185.5	0.079	0.047	0.156	14.735	0.078	58.941	0.93699
												4	227	0.082	0.053	0.184	18.663	0.08	74.651	0.972572
												5	213	0.092	0.056	0.182	19.532	0.09	78.126	1.09118
												6	216	0.095	0.06	0.162	20.606	0.093	82.424	1.12676
												7	355.5	0.074	0.043	0.122	26.289	0.073	105.156	0.877687
												8	261.5	0.073	0.038	0.112	19.07	0.073	76.279	0.865827
												9	168.75	0.082	0.056	0.128	13.909	0.081	55.634	0.972572
												10	238.5	0.087	0.056	0.17	20.669	0.085	82.676	1.03188
												11	141.5	0.079	0.057	0.132	11.108	0.077	44.432	0.93699
												12	225.25	0.092	0.056	0.198	20.788	0.089	83.154	1.09118
												13	284.5	0.082	0.059	0.128	23.281	0.08	93.126	0.972572
												14	136.25	0.086	0.054	0.13	11.771	0.085	47.084	1.02001
												15	200	0.095	0.067	0.14	18.993	0.094	75.972	1.12676
												16	142.25	0.074	0.051	0.137	10.526	0.073	42.103	0.877687
													average	0.0843125					average	1
													stdev	0.00738542					stdev	0.0875957
											genotype	ROI	Area	Mean	Min	Max	IntDens	Median	RawIntDensity	Relative value
											mig-6(qv33)	1	133.25	0.084	0.053	0.142	11.158	0.081	44.632	0.996294
												2	139.75	0.086	0.052	0.177	12.074	0.083	48.296	1.02001
												3	219.25	0.087	0.054	0.19	19.076	0.084	76.304	1.03188
												4	219	0.08	0.047	0.207	17.44	0.077	69.759	0.948851
												5	198.75	0.079	0.05	0.209	15.637	0.077	62.549	0.93699
												6	257.75	0.081	0.053	0.215	20.951	0.078	83.806	0.960712
												7	226.25	0.085	0.056	0.213	19.266	0.081	77.063	1.00815
												8	235.25	0.08	0.048	0.208	18.9	0.077	75.602	0.948851
												9	198.75	0.086	0.05	0.207	17.015	0.082	68.059	1.02001
												10	208.25	0.086	0.049	0.162	17.816	0.083	71.266	1.02001
												11	215.25	0.083	0.045	0.167	17.961	0.082	71.844	0.984433
												12	335.25	0.075	0.047	0.164	25.243	0.074	100.971	0.889548
												13	235.75	0.071	0.039	0.162	16.786	0.07	67.143	0.842105
												14	258.25	0.073	0.04	0.141	18.942	0.072	75.767	0.865827
												15	223.25	0.079	0.056	0.142	17.733	0.078	70.933	0.93699
												16	367	0.073	0.041	0.194	26.895	0.072	107.579	0.865827
												17	242.25	0.077	0.048	0.161	18.58	0.075	74.322	0.913269
												18	384.5	0.075	0.044	0.11	28.84	0.075	115.359	0.889548
												19	416.5	0.071	0.038	0.109	29.759	0.071	119.038	0.842105
												20	232	0.082	0.048	0.141	19.124	0.082	76.495	0.972572
												21	353	0.077	0.043	0.137	27.03	0.075	108.122	0.913269
												22	325.5	0.075	0.044	0.107	24.436	0.075	97.743	0.889548
												23	416.75	0.072	0.047	0.116	30.068	0.072	120.273	0.853966
												24	310	0.076	0.045	0.136	23.497	0.075	93.986	0.901408
												25	309.25	0.081	0.047	0.155	25.126	0.08	100.505	0.960712
													average	0.07896					average	0.936516
													stdev	0.00503441					stdev	0.0597113
													Welch two sample unpaired t-test	p value (WT vs mig-6) mut = 0,0194					Welch two sample unpaired t-test	p value (WT vs mig-6) mut = 0,0194
														degrees of freedom= 23,823						degrees of freedom= 23,823

[truncated: 2 more sheets: Fig S10A, Fig 10B]
