# Supplementary material for: Remodeling of extracellular matrix collagen IV by MIG-6/papilin regulates neuronal architecture
Source: Research Square preprint supplement (doi:10.21203/rs.3.rs-5962240/v1), 2025-02-14
Supplement: Supplementary file 2 [file d84bf14f5eb555e5bada68b3.xlsx]

## Sheet: Fig 1B
Genotype	Transgene	N	% Defective	S.E.P.
hdIs26		106	4.7	2.06
sax-7(qv30); hdIs26		103	92.2	2.64
mig-6(qv33); hdIs26		105	0	0
sax-7(qv30); mig-6(qv33); hdIs26		106	29.3	4.42
sax-7(qv30); mig-6(qv33); hdIs26; qvEx336 (line 1)	Pmig-6::mig-6S	131	47.0	4
sax-7(qv30); mig-6(qv33);hdIs26; qvEx337 (line 2)	Pmig-6::mig-6S	107	50.0	5

## Sheet: Fig 1C
Genotype	N	% Defective	S.E.P.
sax-7(qv30); hdIs26; control RNAi	102	99.0	1
sax-7(qv30); hdIs26; mig-6(RNAi)	139	50.0	4

## Sheet: Fig 1E
Genotype	Transgene	N	% Defective	S.E.P.
hdIs26		136	0	0
sax-7(qv30); hdIs26		258	33.3	2.9
sax-7(qv30) IV; mig-6(qv33) V; hdIs26 III; qvEx608 (line 1)	Pmyo-3::mig-6S∆papilin casette/lagrin repeats	145	32.4	3.89
sax-7(qv30) IV; mig-6(qv33) V; hdIs26 III; qvEx609 (line 2)	Pmyo-3::mig-6S∆papilin casette/lagrin repeats	154	36.4	3.88
sax-7(qv30) IV; mig-6(qv33) V; hdIs26 III; qvEx610 (line 1)	Pmyo-3::mig-6S∆Kunitz domains	173	51.5	3.80
sax-7(qv30) IV; mig-6(qv33) V; hdIs26 III; qvEx615 (line 2)	Pmyo-3::mig-6S∆Kunitz domains	176	50.6	3.77

## Sheet: Fig 1F
Genotype		N	% Defective	S.E.P.
hdIs26	L2	102	1.0	0.98
	L4	108	0	0
	Day 2 Adults	104	2.9	1.64
sax-7(qv30); hdIs26	L2	102	4.9	2.14
	L4	103	50.5	4.93
	Day 2 Adults	107	86	3.4
mig-6(qv33); hdIs26	L2	100	0	0
	L4	101	0	0
	Day 2 Adults	117	0	0
mig-6(k177); hdIs26	L2	114	0	0
	L4	101	0	0
	Day 2 Adults	111	0	0
mig-6(ev700); hdIs26	L2	-	-	-
	L4	100	0	0
	Day 2 Adults	75	0	0
mig-6(ev701); hdIs26	L2	-	-	-
	L4	101	1.0	0.99
	Day 2 Adults	102	4.9	2.14
mig-6(sa580); hdIs26	L2	-	-	-
	L4	107	0	0
	Day 2 Adults	102	3.0	1.67
mig-6(e1931); hdIs26	L2	-	-	-
	L4	-	-	-
	Day 2 Adults	41	4.9	3.36
sax-7(qv30); mig-6(qv33); hdIs26	L2	101	4.0	1.94
	L4	101	22.8	4.17
	Day 2 Adults	112	29.5	4.3
sax-7(qv30); mig-6(k177); hdIs26	L2	107	10.3	2.94
	L4	105	16.2	3.59
	Day 2 Adults	104	20.2	3.94
sax-7(qv30); mig-6(ev700); hdIs26	L2	-	-	-
	L4	106	23.6	4.12
	Day 2 Adults	109	44.0	4.75
sax-7(qv30); mig-6(ev701); hdIs26	L2	-	-	-
	L4	102	40.2	4.85
	Day 2 Adults	103	37.9	4.78
sax-7(qv30); mig-6(sa580); hdIs26	L2		-	-
	L4	104	44.2	4.87
	Day 2	103	82.5	3.74
sax-7(qv30); mig-6(e1931); hdIs26	L2	-	-	-
	L4	-	-	-
	Day 2 Adults	35	91.4	4.73

## Sheet: Fig 2B
Genotype		N	% Defective	S.E.P.
hdIs26	L1	134	7.5	2.27
	L4	143	9.8	2.49
sax-7(qv30); hdIs26	L1	144	8.3	2.30
	L4	133	33.1	4.08
mig-6(qv33); hdIs26	L1	110	9.1	2.74
	L4	104	20.2	4.05
sax-7(qv30); mig-6(qv33); hdIs26	L1	109	8.3	2.64
	L4	150	20.0	3.27

## Sheet: Fig 2C
Genotype		N	% Defective	S.E.P.
hdIs26	L4	143	9.8	2.49
zig-3(tm924) zig-4(gk34); hdIs26	L4	252	35.3	3.90
mig-6(qv33); hdIs26	L4	104	20.2	4.05
mig-6(qv33); zig-3(tm924) zig-4(gk34); hdIs26	L4	252	30.6	4.34

## Sheet: Fig 2D
Genotype		N	% Defective	S.E.P.
hdIs26	L4	96	9.4	2.97
dig-1(ky188); hdIs26	L4	93	45.2	5.16
mig-6(qv33); hdIs26	L4	131	17.6	3.32
mig-6(qv33); dig-1(ky188) hdIs26	L4	126	18.3	3.44

## Sheet: Fig 2E
Genotype	Age	N	% Defective	S.E.P.
hdIs26	L4	96	0	0
dig-1(ky188); hdIs26	L4	88	35.2	5.1
mig-6(qv33); hdIs26	L4	131	0	0
mig-6(qv33); dig-1(ky188) hdIs26	L4	119	43.7	4.5

## Sheet: Fig 2F
Genotype	N	% Defective	S.E.P.
hdIs26	113	2.7	1.51
dig-1(1321); hdIs26	128	76.6	4.29
mig-6(qv33); hdIs26	105	0	0
dig-1(n1321); mig-6(qv33); hdIs26	125	46.40	5.37

## Sheet: Fig 3C
Genotype	N	% Defective	S.E.P.
hdIs26	132	3.8	1.66
sax-7(qv30); hdIs26	112	91.1	2.7
mig-17(k174); hdIs26	101	0	0
sax-7(qv30); mig-17(k174); hdIs26	118	27.1	5.54
mig-6(qv33); hdIs26	123	0	0
mig-6(qv33) mig-17(k174); hdIs26	102	0	0
sax-7(qv30); mig-6(qv33); hdIs26	131	30.5	4
sax-7(qv30); mig-6(qv33) mig-17(k174); hdIs26	103	39.8	4.82
mig-6(qv33)/+; hdIs26	78	0	0
mig17(k174)/dpy-11 oyIs14	102	15.7	3.60
sax-7(qv30); dpy-11(e224) oyIs14/+ +	186	97.3	1.19
sax-7(qv30); mig-6(qv33)/dpy-11(e224) oyIs14; hdIs26	225	81.8	2.57
sax-7(qv30); mig-17(k174)/dpy-11 oyIs14; hdIs26	102	90.2	2.94
sax-7(qv30); mig-6(qv33) mig-17(k174)/ dpy-11(e224) oyIs14; hdIs26	235	69.4	3.01
adt-2(wk156); hdIs26	100	2	1.4
sax-7(qv30); adt-2(wk156); hdIs26	101	96.0	1.94
mig-6(qv33); adt-2(wk156); hdIs26	102	0	0
sax-7(qv30); mig-6(qv33); adt-2(wk156); hdIs26	100	43.0	4.95

[truncated: 24 more sheets: Fig 3D, Fig 3E, Fig 4B, Fig 4D , Fig 4F , Fig 4G, Fig 4H, Fig 4J, Fig 5D, Fig 6B, Fig 6C, Fig 6D, Fig 6E, Fig 6G, Fig 7A, Fig 7B, Fig 7C, Fig 7D, Fig 7F, Fig 7G …]
